# Supplementary material for: The Role of Moral Distress on Physician Burnout during COVID-19
Source: Preprints.org preprint supplement (doi:10.20944/preprints202203.0298.v1), 2022-03-22
Supplement: Supplementary file 2 [file tables1.docx]

**Table S1:** Participant Demographics (N = 479)

| **Gender** | **f** | **%** |
| --- | --- | --- |
| Female | 373 | 77.87% |
| Male | 105 | 21.92% |
| They/Them | 1 | 0.21% |
| **Age** | **f** | **%** |
| 25-39 | 219 | 45.72% |
| 40-55 | 228 | 47.60% |
| 56-73 | 33 | 6.89% |
| **Region*** | **f** | **%** |
| Northeast | 117 | 24.42% |
| Southeast | 71 | 14.82% |
| West | 64 | 13.36% |
| Southwest | 65 | 13.57% |
| Midwest | 91 | 19.00% |
| Multiple regions | 61 | 12.73% |
| Non-US | 9 | 1.88% |
| Did not answer | 1 | 0.21% |
| **Infected with COVID-19** | **f** | **%** |
| Yes | 57 | 11.90% |
| No | 421 | 87.89% |
| **Family infected with COVID-19** | **f** | **%** |
| Yes | 184 | 38.41% |
| No | 295 | 61.59% |

*Participants identified the states in which they were licensed to practice. They were then coded using US Census standards into regions. When participants listed more than one state within the same region, they were counted as practicing within that region alone; when their area of practice straddled more than one region, they were placed into the “multiple regions” category.
